# Supplementary material
Source: MDPI journal article supplement (https://www.mdpi.com/2311-5637/9/7/656)
Supplement: s1 [file s1]

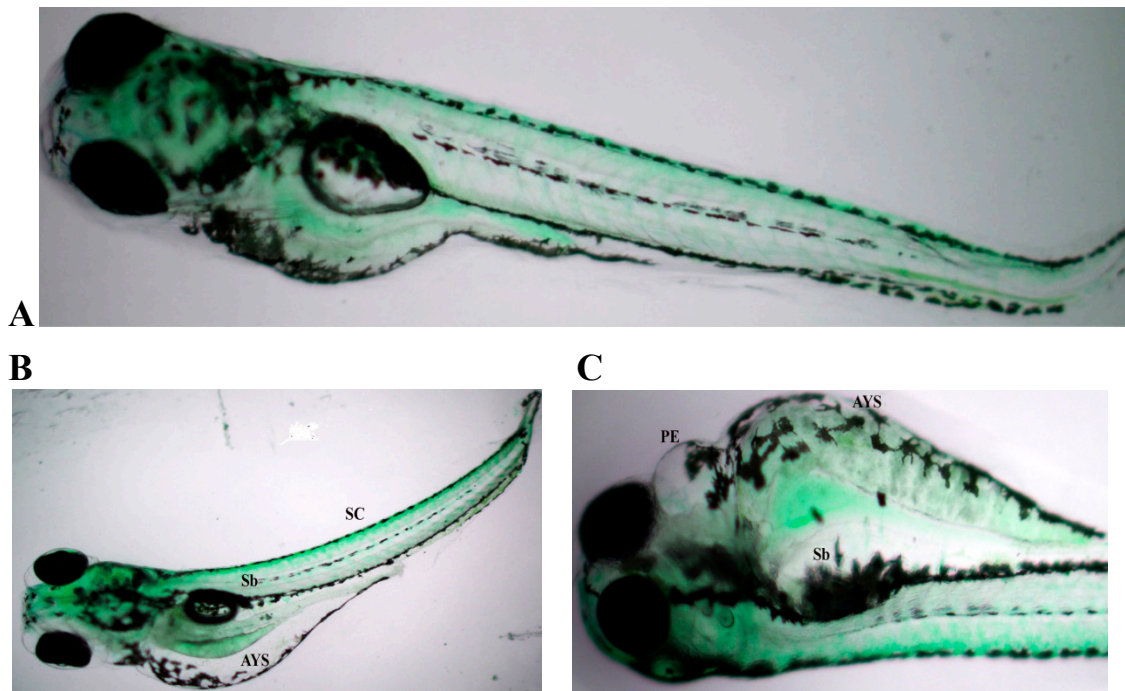

**Figure S1.** Photomicrographic representation of morphological structure of zebrafish larva at 128 hpf. (A) Control group sustained in filtered water at 128 hpf; (B,C) Ethanol treatment group exposed to 2% EtOH for 32 h. SC: spinal curvature; PE: pericardial edema; Sb: swim bladder; AYS: abnormal yolk sac.

**Table S1.** The sequences of primer pairs used in real-time quantitative PCR assay.

| Gene    | Forward primer         | Reverse primer         |
|---------|------------------------|------------------------|
| NF-κB   | AGAGAGCGCTTGCCTCCTT    | TTGCCTTTGGTTTTTCGGTAA  |
| Nrf2    | TCGGGTTTGTCCCTAGATG    | AGGTTTGGAGTGTCCGCTA    |
| HO-1    | ATGCCCTTGTTTCCAGTCAGC  | GGACTTGGAGCACTTCTTCGG  |
| β-actin | TCGTCCACCGCAAATGCTTCTA | CCGTCACCTTCACCGTTCCAGT |

**Table S2.** Mortality and body length of zebrafish larvae treated with SSF-jujube. Values are means  $\pm$  SD ( $n=3$ ).

| Group                       | Total quantity | Number of death | Mortality (%) | Body length(mm)    |
|-----------------------------|----------------|-----------------|---------------|--------------------|
| Control                     | 120            | 4               | 3.3           | 3.696 $\pm$ 0.084  |
| 2% EtOH                     | 120            | 12              | 10.0          | 3.336 $\pm$ 0.0120 |
| 2% EtOH + 10 $\mu$ g/mL SSF | 120            | 8               | 6.7           | 3.654 $\pm$ 0.115  |
| 2% EtOH + 30 $\mu$ g/mL SSF | 120            | 6               | 5.0           | 3.615 $\pm$ 0.096  |
| 2% EtOH + 50 $\mu$ g/mL SSF | 120            | 6               | 5.0           | 3.603 $\pm$ 0.038  |
